# Supplementary material
Source: Springer Nature journal article supplement (https://www.springermedizin.de/resource/supplementary/13014_2013_1227_MOESM1_ESM.pdf/9635194)
Supplement: MOESM1 [file 9635194]

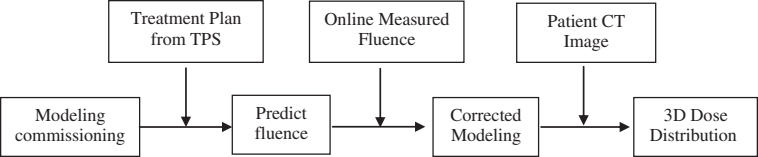

Treatment Plan  
from TPS

Online Measured  
Fluence

Patient CT  
Image

Modeling  
commissioning

Predict  
fluence

Corrected  
Modeling

3D Dose  
Distribution
